# Supplementary material
Source: PubMed Central journal article supplement (PMC7833625)
Supplement: mmc1.pdf [file mmc1.pdf]

# THE LANCET

## Gastroenterology & Hepatology

### Supplementary appendix

This appendix formed part of the original submission. We post it as supplied by the authors.

Supplement to: Thorburn D, Taylor R, Whitney J, et al. Resuming liver transplantation amid the COVID-19 pandemic. *Lancet Gastroenterol Hepatol* 2021; **6**: 12–13.

## **Supplementary figure legends**

Figure S1a – Number of livers from UK deceased donors offered, retrieved and transplanted, showing time-points in donor criteria age restrictions (4<sup>th</sup> Feb 2020 -6<sup>th</sup> July 2020)

Figure S1b– Number of livers from UK deceased donors offered, retrieved and transplanted, showing time-points in changes to the liver offering scheme (4<sup>th</sup> Feb 2020- 6<sup>th</sup> July 2020)

Figure S2a – Number of patients on the UK liver transplant waiting list at the end of each month (Jan 2019- June 2020)

Figure S2b – Number of new registrations to UK Liver transplant waiting list, per month (Jan 2019- June 2020)

Figure S2c – Number of deaths or removals from UK liver transplant waiting list, per month (Jan 2019- July 2020)

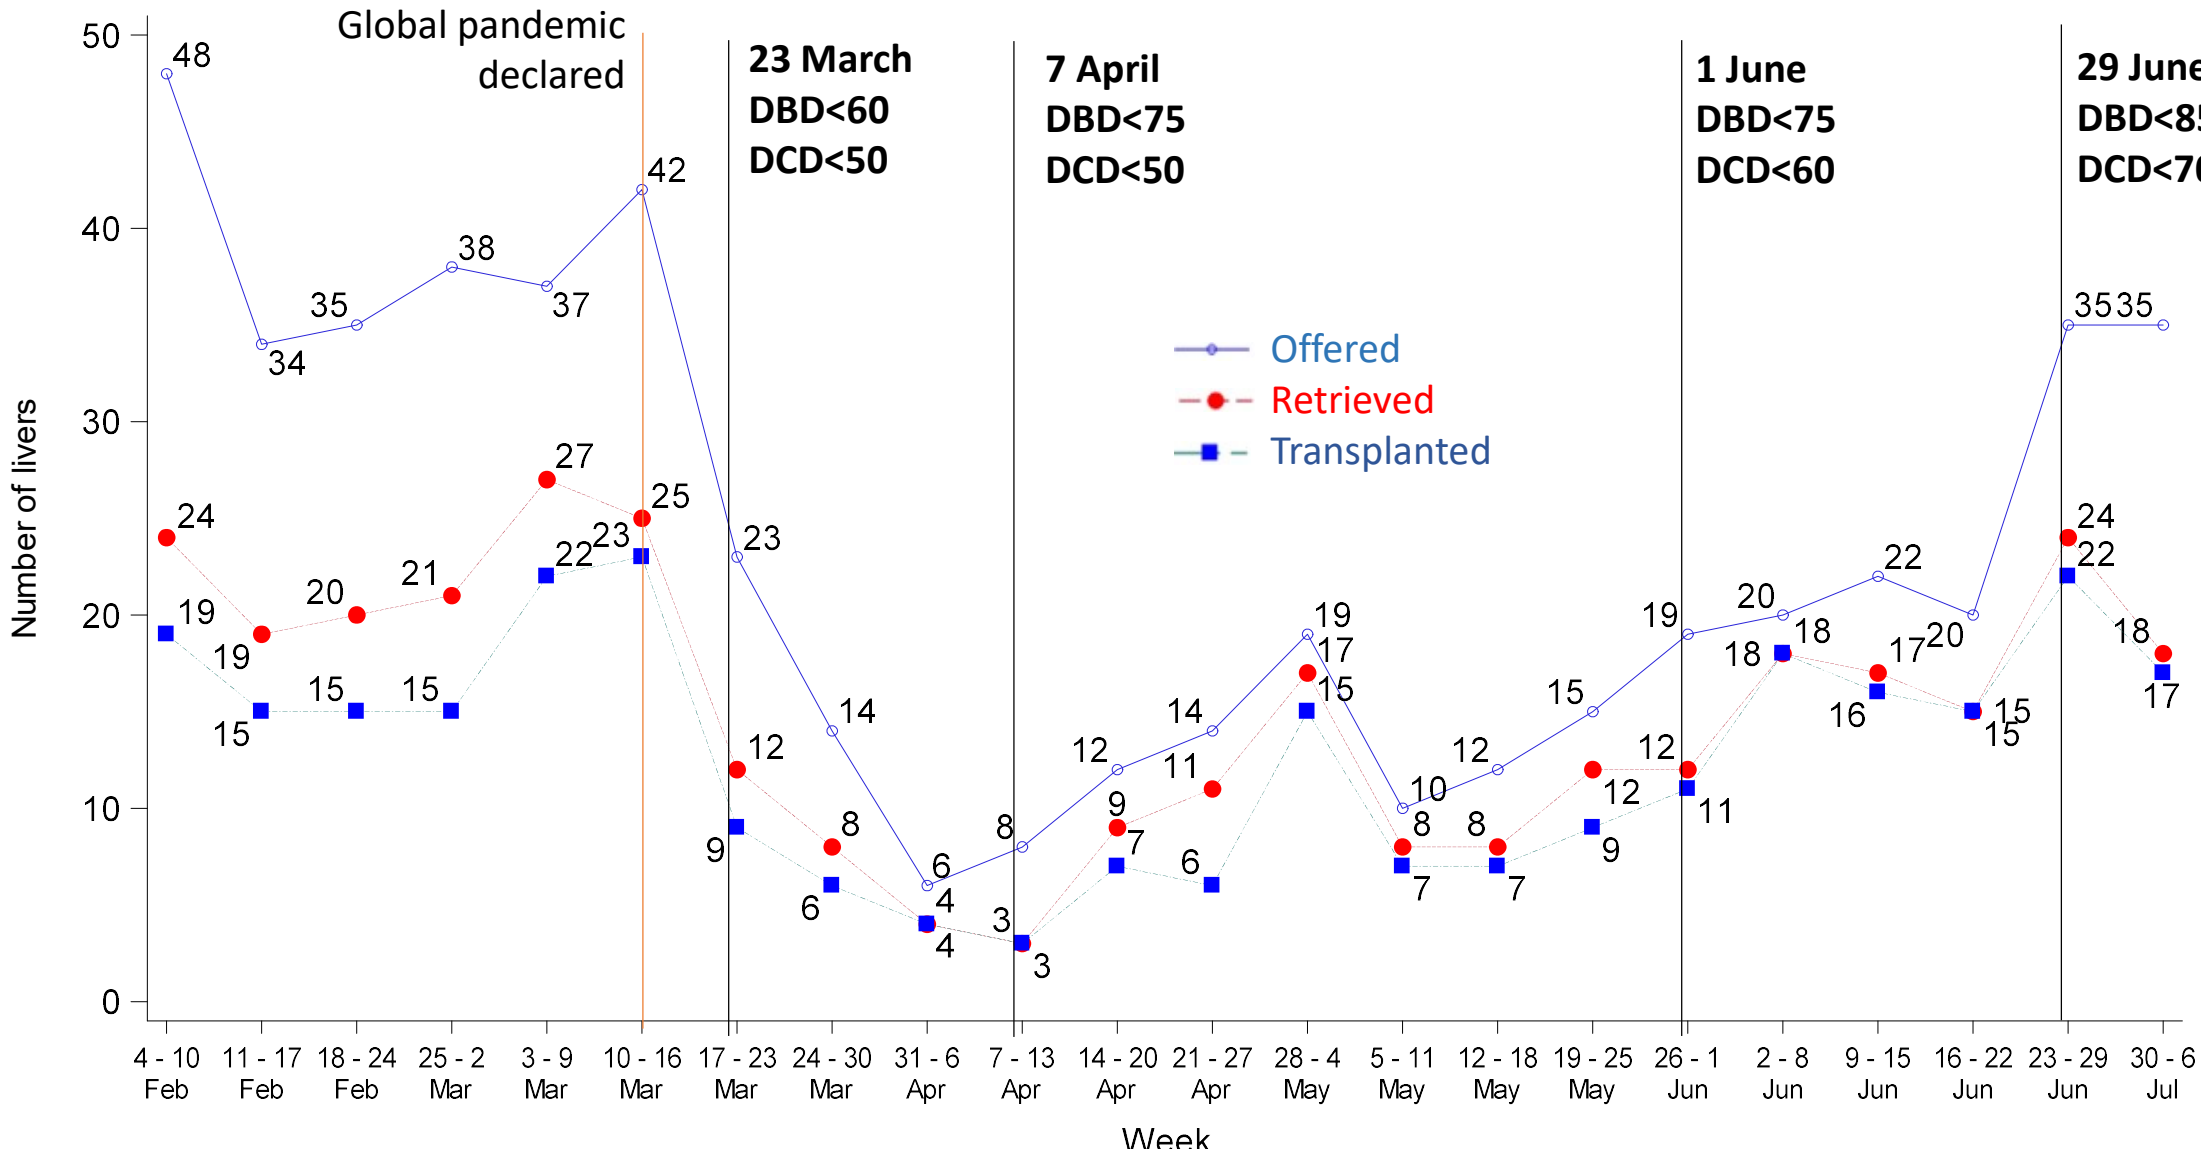

Fig S1a

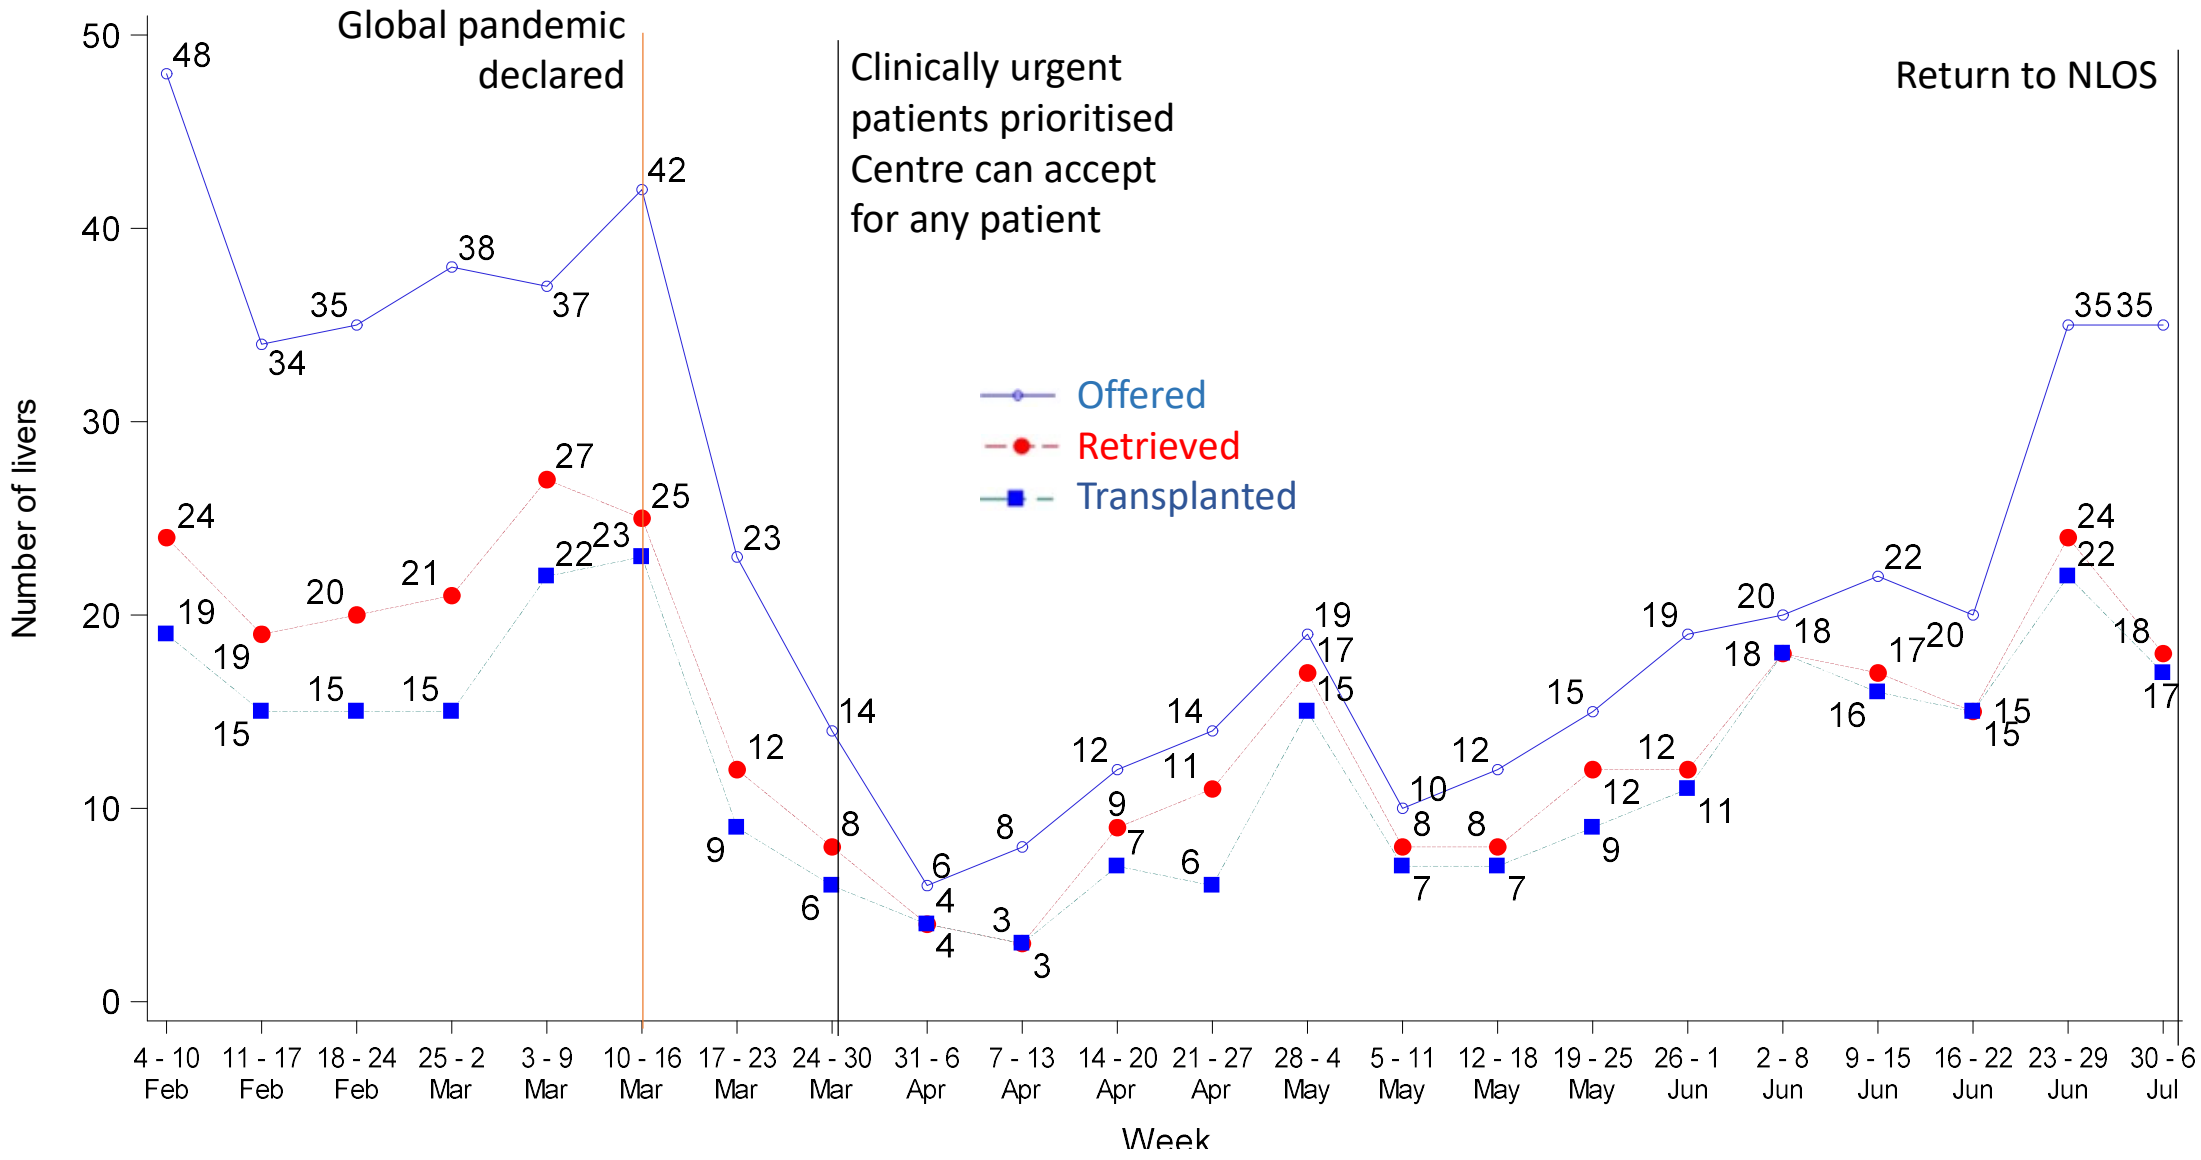

Fig S1b

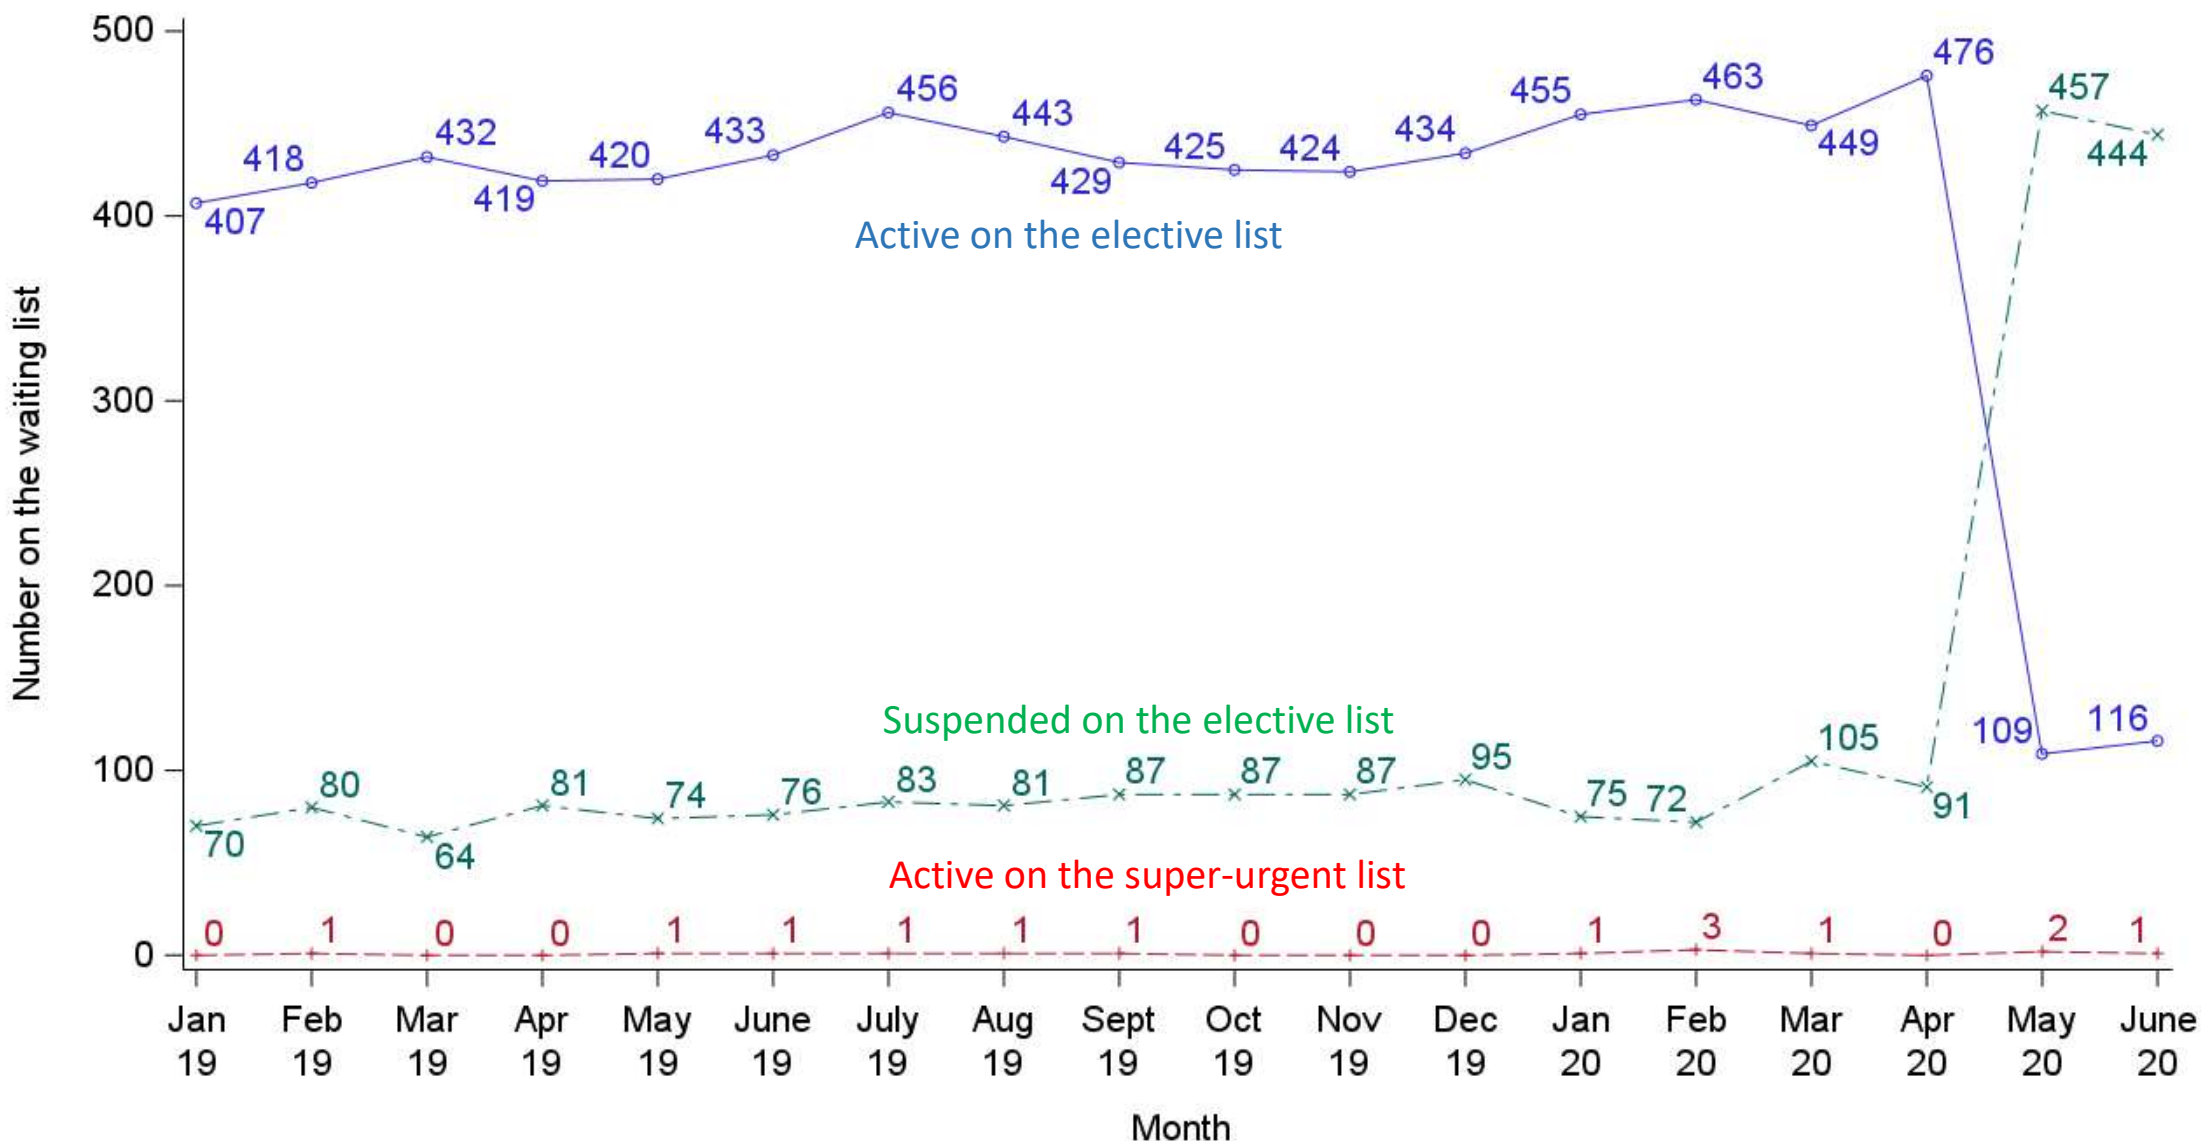

Fig S2a

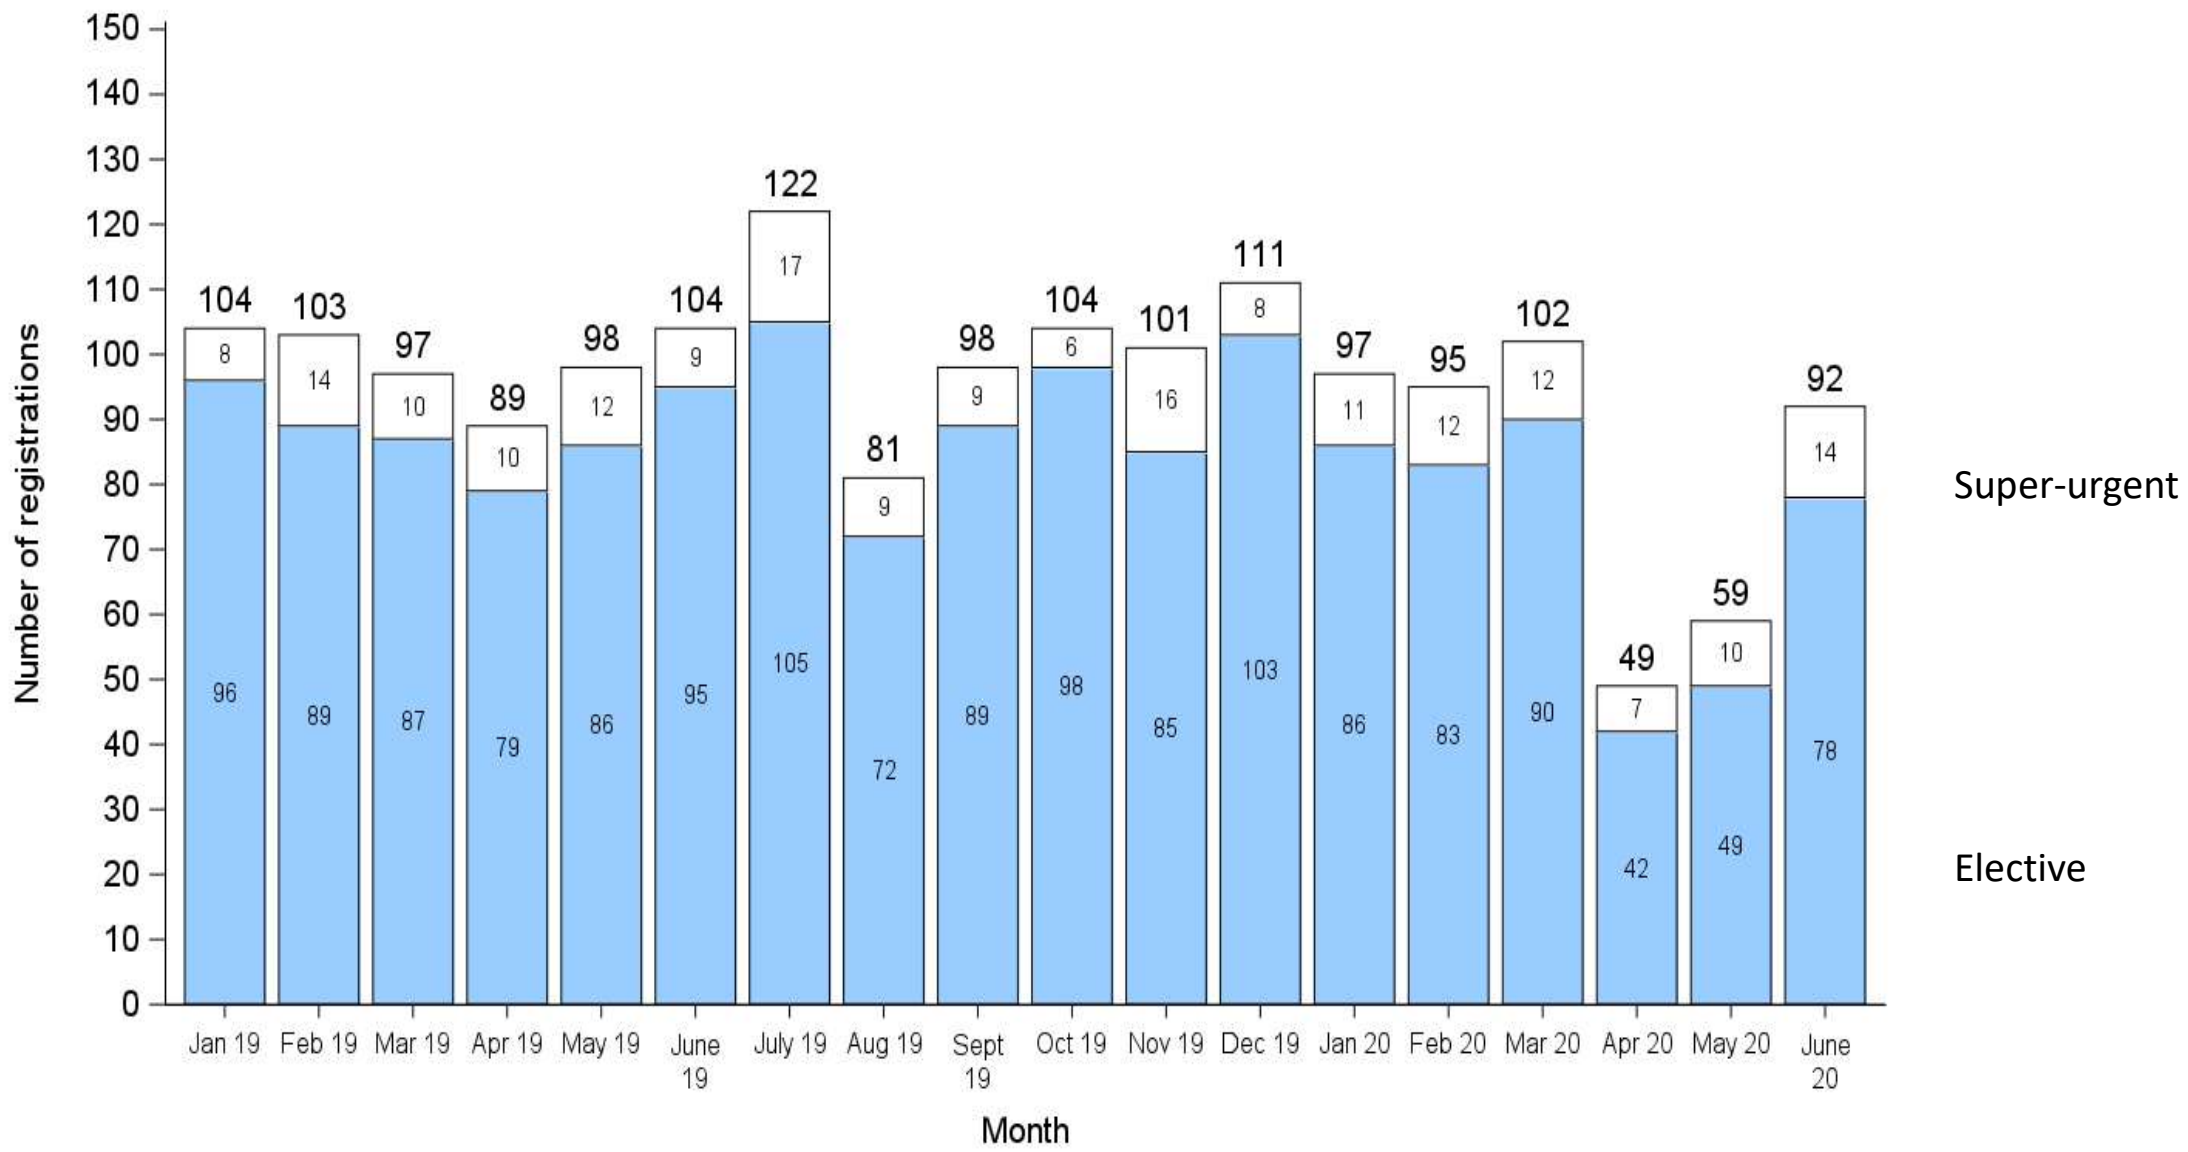

Fig S2b

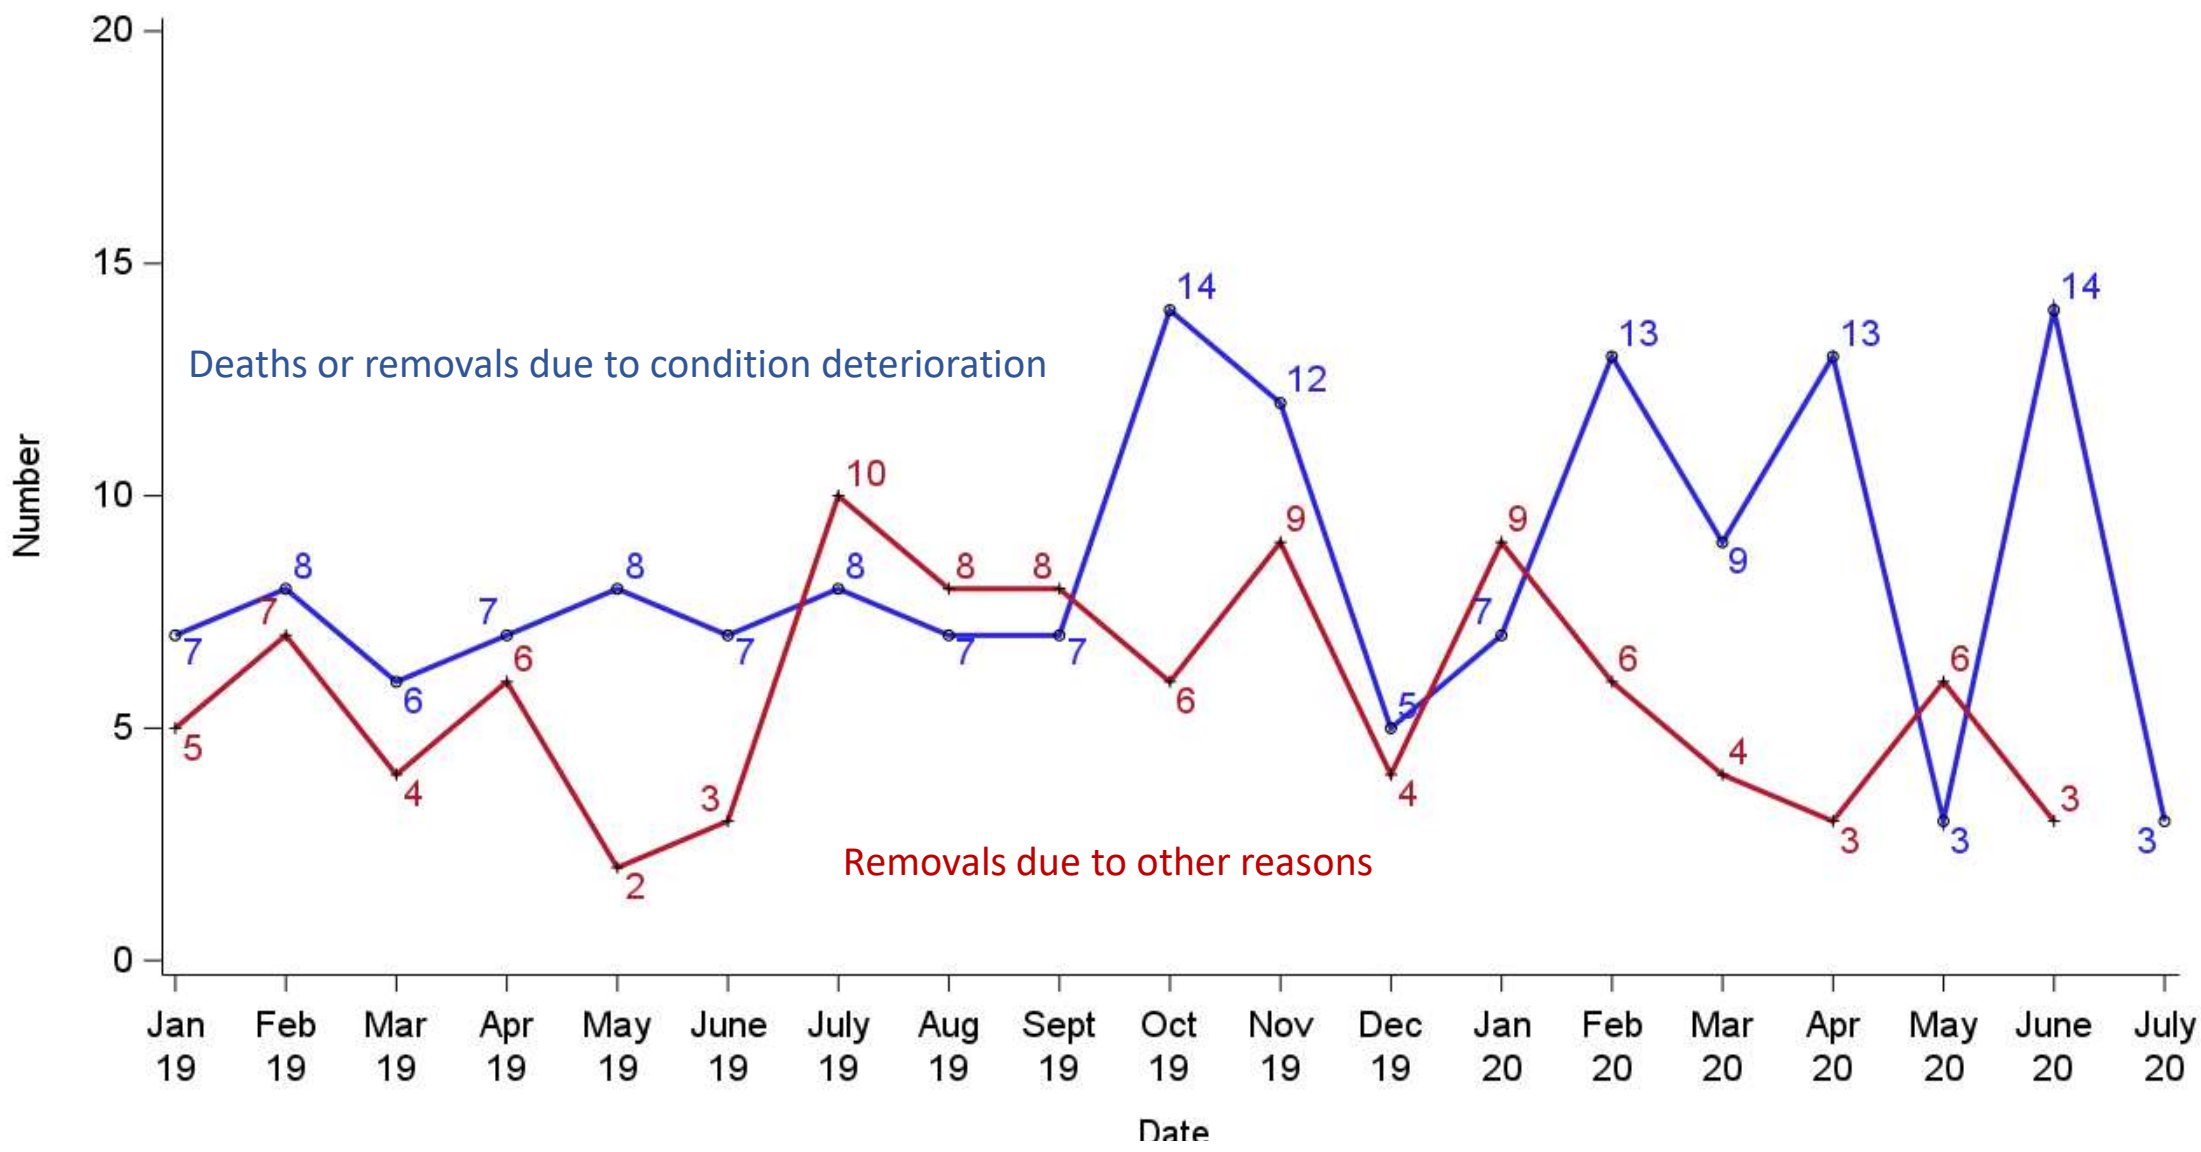

Fig S2c
